# Supplementary material for: Enhancement of photoluminescence and the stability of CsPbX3(X = Cl, Br, and I) perovskite nanocrystals with phthalimide passivation
Source: Royal Society of Chemistry journal article supplement (doi:10.1039/d1nr03916d), 2021-01-01
Supplement: d1nr03916d1.pdf [file d1nr03916d1.pdf]

## Supporting Information

### Enhancement of Photoluminescence and Stability of CsPbX<sub>3</sub> (X= Cl, Br, and I) Perovskite Nanocrystals with Phthalimide Passivation

V. G. Vasavi Dutt,<sup>1</sup> Syed Akhil,<sup>1</sup> Nimai Mishra<sup>1\*</sup>

#### Table of Contents

1. Sources of materials
2. Experimental Procedures
  - 2.1. Preparation of Cs-oleate precursor
  - 2.2. Synthesis and purification of CsPbX<sub>3</sub> perovskite nanocrystals
3. Characterizations
  - 3.1. Absorption and steady-state fluorescence
  - 3.2. X-Ray Diffraction (XRD)
  - 3.3. Time-resolved photoluminescence
  - 3.4. Transmission Electron Microscopy (TEM)
  - 3.5. Photoluminescence Quantum Yield (PLQY)
  - 3.6. X-Ray Photoelectron Spectroscopy (XPS)
4. Figure S1: Photoluminescence spectra of CsPbX<sub>3</sub> NCs with phthalimide passivation of different halide composition covering most of the entire visible range.
5. Figure S2: Transmission Electron Microscope images of as-synthesized CsPbCl<sub>3</sub>, CsPbBr<sub>3</sub>, and CsPbI<sub>3</sub> NCs without phthalimide.
6. Figure S3: XRD patterns of CsPbCl<sub>1.5</sub>Br<sub>1.5</sub> and CsPbBr<sub>1.5</sub>I<sub>1.5</sub> perovskite NCs with and without phthalimide and inset is their respective photograph taken under UV light illumination of wavelength 365 nm.
7. Figure S4: (a) The photographs of (a) CsPbCl<sub>1.5</sub>Br<sub>1.5</sub> NCs and (b) CsPbBr<sub>1.5</sub>I<sub>1.5</sub> NCs labelled (I) without and (II) with phthalimide under UV light (365 nm, 8 W/cm<sup>2</sup>) and their respective UV-Vis absorbance and photoluminescence spectra.
8. Figure S5: PL decay profiles of (a) CsPbCl<sub>1.5</sub>Br<sub>1.5</sub> NCs and (b) CsPbBr<sub>1.5</sub>I<sub>1.5</sub> NCs without phthalimide (blue line) and with phthalimide (red line).
9. Figure S6: XPS full survey spectra of CsPbCl<sub>3</sub> NCs (b) Core-level XPS spectra of chloride of CsPbCl<sub>3</sub> NCs without phthalimide (black line) and with phthalimide (red line) passivation.
10. Figure S7: XPS full survey spectra of CsPbI<sub>3</sub> NCs (b) Core-level XPS spectra of iodide of CsPbI<sub>3</sub> NCs without phthalimide (black line) and with phthalimide (red line) passivation.

#### 1. Sources of materials

Cesium Carbonate (Cs<sub>2</sub>CO<sub>3</sub>; 99.9%, Alfa Aesar), Octadecene (ODE; 90%, Alfa Aesar), Oleic acid (OA; Alfa Aesar), Oleylamine (OAm; Alfa Aesar), Lead (II) Chloride (PbCl<sub>2</sub>; 98%, Aldrich), Lead (II) Bromide (PbBr<sub>2</sub>; 98+%, Alfa Aesar), Lead (II) Iodide (PbI<sub>2</sub>; 99%, Aldrich), Hexane (99%, anhydrous), n-trioctylphosphine (TOP; 90%, Aldrich), Phthalimide (C<sub>8</sub>H<sub>5</sub>NO<sub>2</sub>; >99%, Himedia).

#### 2. Experimental Procedures

##### 2.1. Preparation of Cs-oleate precursor

Cs<sub>2</sub>CO<sub>3</sub> (0.2 g) was taken into 15 mL capacity vial along with ODE (7.5 mL) and OA (0.88 mL), dried for 1 hour at 120 °C under open atmospheric conditions. Cs-oleate precipitates at room temperature, hence it is pre-heated upto 100 °C before use.

## **2.2. Synthesis and purification of CsPbX<sub>3</sub> perovskite nanocrystals**

In a typical synthesis, 5 mL ODE, 0.5 mL OA, 0.5 mL OAm, and 0.188 mmol PbX<sub>2</sub> (52 mg PbCl<sub>2</sub> or 69 mg- PbBr<sub>2</sub> or 87 mg- PbI<sub>2</sub>) were taken in a 20 mL vial and dried for 40 minutes at 120 °C in open atmospheric conditions. The temperature was raised to 140 °C after PbX<sub>2</sub> was dissolved completely. To it, 0.1 mmol of phthalimide was added to the reaction mixture. Consecutively, after the complete solvation, 0.4 mL of previously prepared Cs-oleate solution was rapid injected. The reaction was then quenched to room temperature using ice bath after 2 minutes of nucleation and subsequent growth. The crude solution was then purified via centrifugation by discarding supernatant and re-dispersing in hexane. Unlike the other synthesis reported where vacuum and nitrogen atmosphere used, here every step was carried out in open atmospheric conditions without involving any degassing steps.

## **3. Characterizations**

### **3.1. Absorption and steady-state fluorescence:**

Absorption and photoluminescence is recorded using Shimadzu UV-2600i and Horiba Jobin Yvon Fluorolog-3 respectively.

### **3.2. X-Ray Diffraction (XRD):**

Powder X-Ray Diffraction patterns were recorded using Empyrean PANalytical X-Ray Diffractometer with Cu-K $\alpha$  X-radiation ( $\lambda = 1.5406 \text{ \AA}$ ) at 40 kV and 30 mA power.

### **3.3. Time-resolved photoluminescence:**

The time resolved photoluminescence measurements were measured by a time-correlated single photon counting by TCSPC Spectrometer (Horiba Jobin Yvon IBH) with laser diode, output at 372 nm used as excitation laser source. The lamp profile was recorded by using a dilute solution of milk powder in water which act as a scatter in the sample chamber. The fluorescence decay curves were analyzed using IBH DAS6 software.

### **3.4. Transmission Electron Microscopy (TEM):**

The samples were prepared by a dropping of optimum solution of CsPbX<sub>3</sub> NCs in hexane on copper (Cu) grid coated with carbon film and analyzed using JEOL JEM-2100 High-Resolution Transmission Electron Microscope with 0.23 nm point resolution.

### **3.5. Photoluminescence Quantum Yield (PLQY):**

Relative PLQYs were calculated by using an appropriate dye as references. For CsPbCl<sub>3</sub> NCs, 9,10-diphenylanthracene in toluene (QY= 0.93) while for CsPbBr<sub>3</sub> and CsPbI<sub>3</sub> NCs, Coumarine 153 in ethanol (QY= 0.93) and Rhodamine in ethanol (QY= 0.93) were used respectively.

### **3.6. X-Ray Photoelectron Spectroscopy (XPS):**

XPS measurements were performed using Physical Electronics XPS/ ESCA, Model: PHI5000 Version Probe III.

## **4. Results and Discussion**

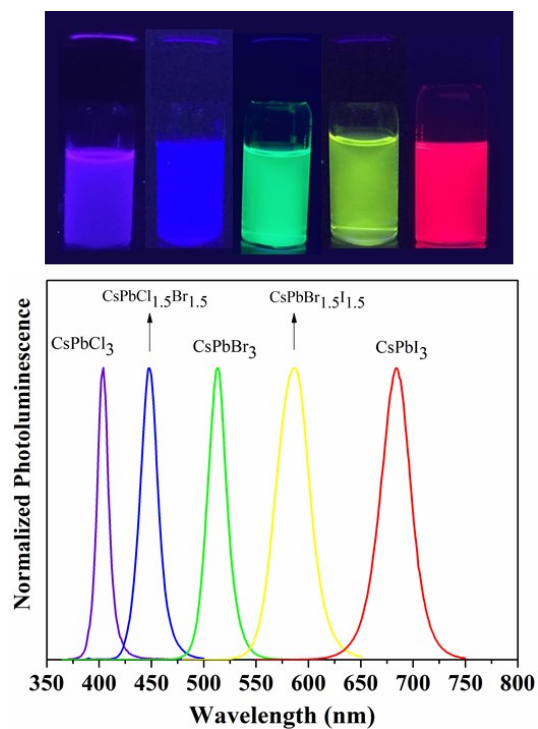

**Figure-S1:** Photoluminescence spectra of CsPbX<sub>3</sub> NCs with phthalimide passivation of different halide composition covering most of the entire visible range.

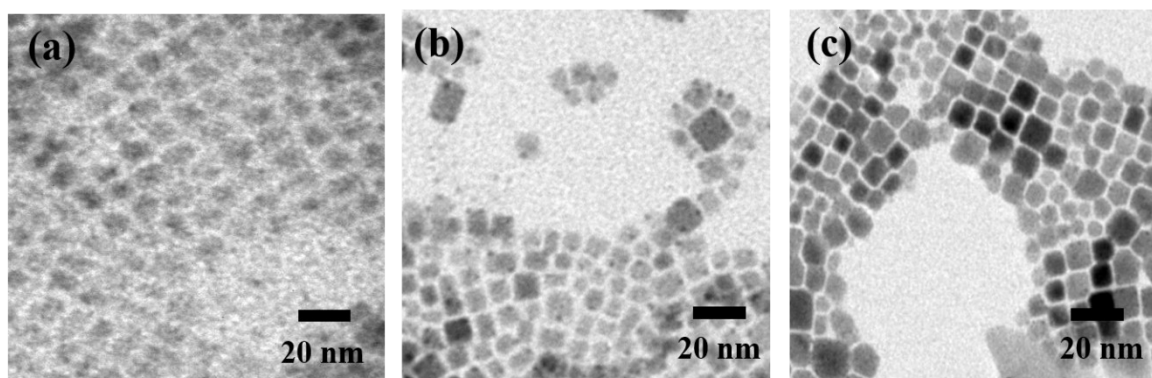

**Figure-S2:** Transmission Electron Microscope images of as-synthesized (a) CsPbCl<sub>3</sub>, (b) CsPbBr<sub>3</sub>, and (c) CsPbI<sub>3</sub> NCs without phthalimide.

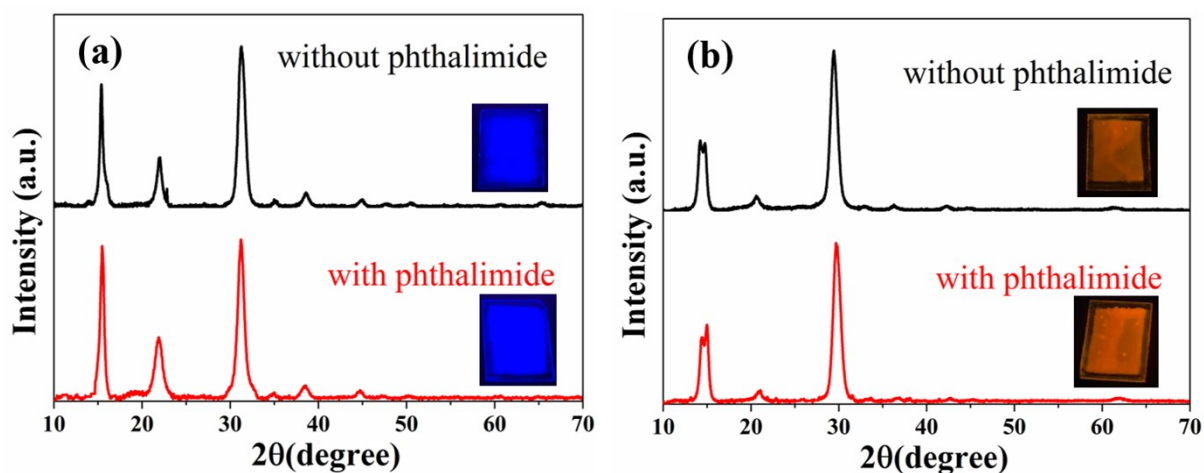

**Figure-S3:** XRD patterns of  $\text{CsPbCl}_{1.5}\text{Br}_{1.5}$  and  $\text{CsPbBr}_{1.5}\text{I}_{1.5}$  perovskite NCs with and without phthalimide and inset is their respective photograph taken under UV light illumination of wavelength 365 nm.

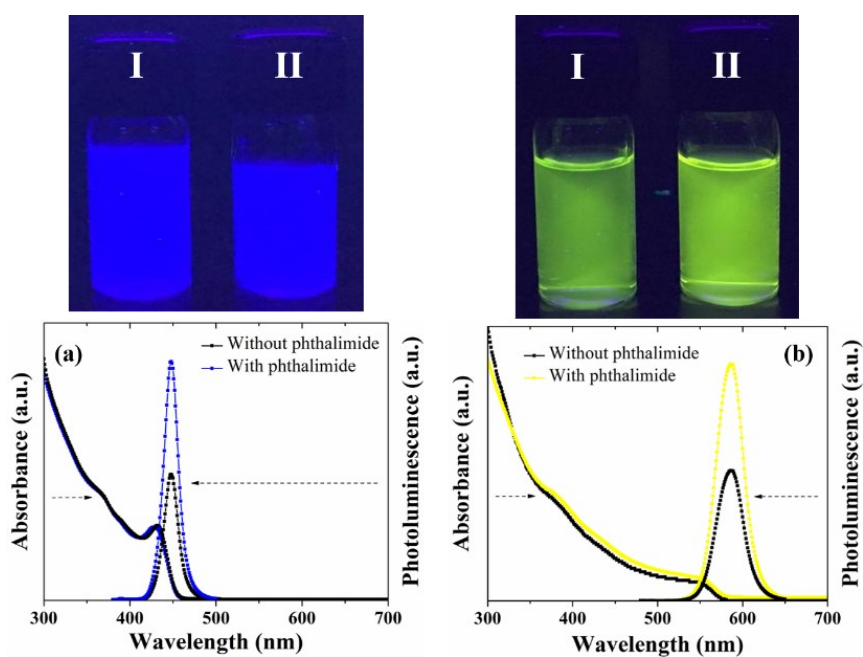

**Figure-S4:** (a) The photographs of (a)  $\text{CsPbCl}_{1.5}\text{Br}_{1.5}$  NCs and (b)  $\text{CsPbBr}_{1.5}\text{I}_{1.5}$  NCs labelled (I) without and (II) with phthalimide under UV light (365 nm, 8 W/cm<sup>2</sup>) and their respective UV-Vis absorbance and photoluminescence spectra.

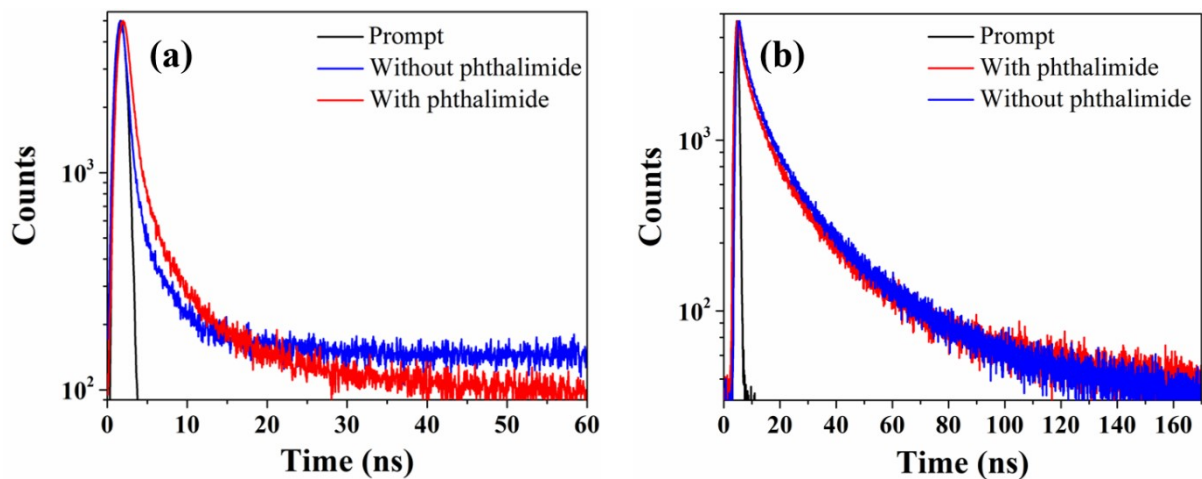

**Figure-S5:** PL decay profiles of (a) CsPbCl<sub>1.5</sub>Br<sub>1.5</sub> NCs and (b) CsPbBr<sub>1.5</sub>I<sub>1.5</sub> NCs without phthalimide (blue line) and with phthalimide (red line).

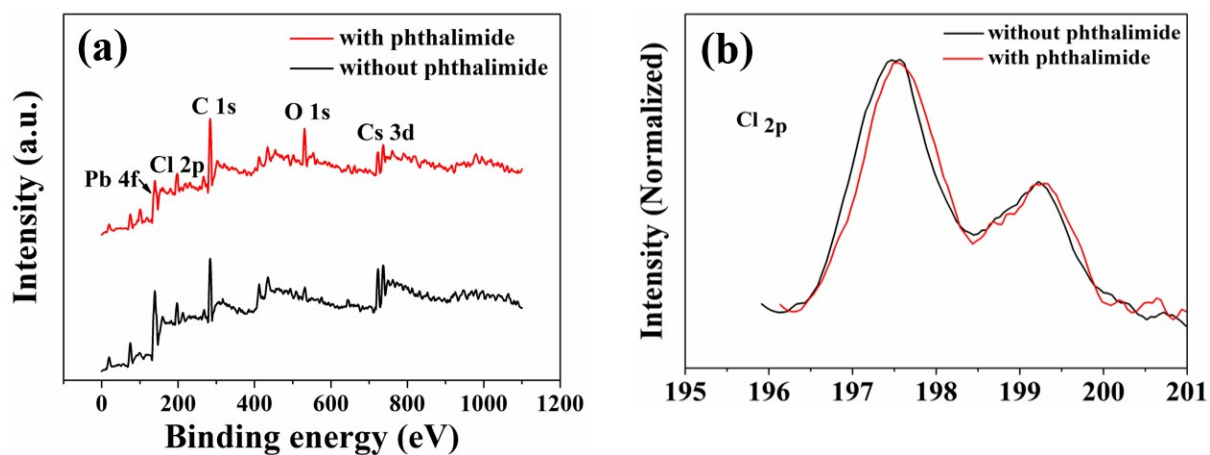

**Figure-S6:** XPS full survey spectra of CsPbCl<sub>3</sub> NCs (a) Core-level XPS spectra of chloride of CsPbCl<sub>3</sub> NCs without phthalimide (black line) and with phthalimide (red line) passivation.

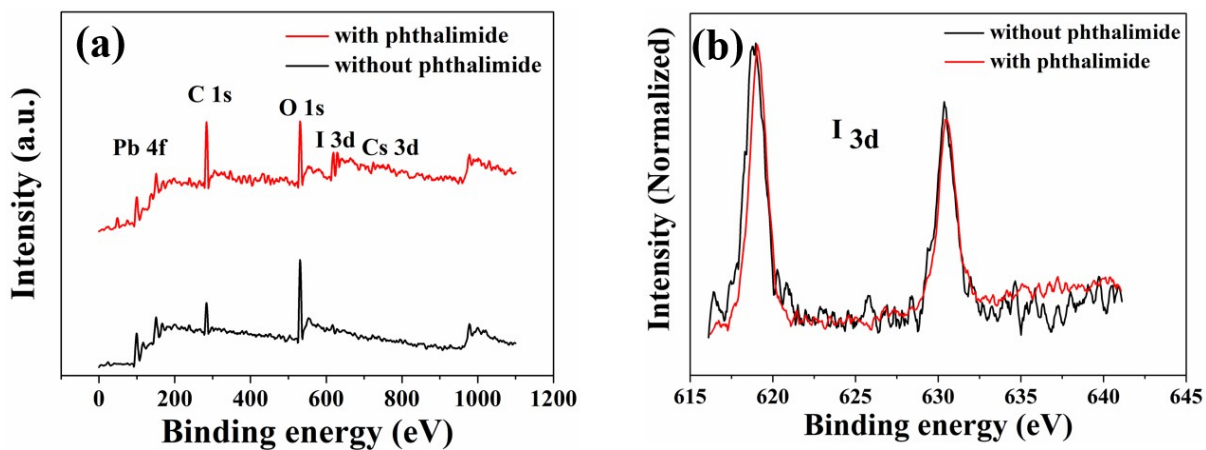

**Figure-S7:** XPS full survey spectra of CsPbI<sub>3</sub> NCs (b) Core-level XPS spectra of iodide of CsPbI<sub>3</sub> NCs without phthalimide (black line) and with phthalimide (red line) passivation.
